# Supplementary material for: The effect of intramolecular interactions on hydrogen bond acidityElectronic supplementary information (ESI) available: summary of retrained regression using DFT methods. See http://www.rsc.org/suppdata/ob/b3/b300598d/
Source: Royal Society of Chemistry journal article supplement (doi:10.1039/b300598d), 2003-03-26
Supplement: b300598d.doc [file b300598d.doc]

**Supporting Information**

Table S1: Summary of retrained regressions using DFT methods

| Property | Coefficient | Intercept | R2 | rmse |
| --- | --- | --- | --- | --- |
| *r*(N···H) | -1.309 | 3.266 | 0.802 | 0.107 |
| *ρ*(N···H) | 40.300 | -0.246 | 0.833 | 0.098 |
| qNCH | 30.150 | -0.043 | 0.854 | 0.093 |
| Δ*E* | 0.038 | -0.204 | 0.918 | 0.070 |
| EPNUC | 5.576 | 5.967 | 0.931 | 0.063 |

**Table S2**: Properties used to generate Table S1

| **Compound** | **Expt A** | **r(N···H)** | **ρ(N···H)** | **qNCH** | ΔE | **EPNUC** |
| --- | --- | --- | --- | --- | --- | --- |
| 4-Fluorophenol | 0.63 | 2.048 | 0.0202 | 0.019 | 21.80 | -0.961 |
| Acrylonitrile | 0.07 | 2.267 | 0.0075 | 0.004 | 8.10 | -1.066 |
| Chloroform | 0.15 | 2.306 | 0.0130 | 0.011 | 12.73 | -1.031 |
| Chloropropyne | 0.19 | 2.358 | 0.0111 | 0.009 | 10.00 | -1.027 |
| Dimethylamine | 0.08 | 2.444 | 0.0093 | 0.006 | 6.69 | -1.069 |
| Ethanol | 0.37 | 2.143 | 0.0166 | 0.011 | 14.61 | -1.002 |
| Hex-1-yne | 0.10 | 2.445 | 0.0092 | 0.006 | 6.23 | -1.050 |
| Imidazole | 0.42 | 2.150 | 0.0167 | 0.017 | 19.73 | -0.980 |
| Methanol | 0.43 | 2.135 | 0.0169 | 0.012 | 15.12 | -1.000 |
| Methylacetamide | 0.40 | 2.265 | 0.0133 | 0.011 | 14.94 | -1.012 |
| Methylaniline | 0.17 | 2.308 | 0.0122 | 0.010 | 11.46 | -1.035 |
| Methylformamide | 0.40 | 2.223 | 0.0145 | 0.012 | 16.18 | -1.004 |
| Methylurethane | 0.24 | 2.252 | 0.0135 | 0.011 | 12.08 | -1.015 |
| Phenol | 0.60 | 2.060 | 0.0197 | 0.018 | 19.99 | -0.967 |
| Trichloroaceticacid | 0.95 | 1.877 | 0.0295 | 0.038 | 29.73 | -0.914 |
| Trichloroethanol | 0.50 | 2.043 | 0.0205 | 0.018 | 17.92 | -0.969 |
| Trifluoromethane | 0.21 | 2.377 | 0.0114 | 0.013 | 12.04 | -1.036 |
| Pyrrolidine | 0.12 | 2.454 | 0.0091 | 0.006 | 6.44 | -1.068 |
| Nitromethane | 0.06 | 2.671 | 0.0063 | 0.000 | 12.72 | -1.047 |
| Triazole | 0.72 | 2.092 | 0.0186 | 0.021 | 24.52 | -0.955 |
| Acetanilide | 0.46 | 2.279 | 0.0130 | 0.013 | 16.72 | -0.998 |
| Formicacid | 0.72 | 1.960 | 0.0243 | 0.026 | 22.87 | -0.936 |
| 4-cyanophenol | 0.80 | 2.004 | 0.0223 | 0.023 | 26.29 | -0.942 |
| 3-nitrobenzoicacid | 0.76 | 1.934 | 0.0258 | 0.030 | 24.42 | -0.932 |
| Pyrazole | 0.54 | 2.136 | 0.0171 | 0.017 | 17.85 | -0.988 |
| Propan-2-ol | 0.33 | 2.195 | 0.0148 | 0.009 | 12.38 | -1.005 |
| Methacrylic acid | 0.62 | 1.982 | 0.0230 | 0.024 | 19.83 | -0.950 |
| Propargylalcohol | 0.38 | 2.102 | 0.0181 | 0.014 | 17.92 | -0.987 |
| 2-chloroethanol | 0.37 | 2.082 | 0.0187 | 0.014 | 12.48 | -0.990 |
| Pentachloroethane | 0.17 | 2.321 | 0.0127 | 0.011 | 11.85 | -1.031 |
| Benzylalcohol | 0.39 | 2.099 | 0.0182 | 0.014 | 17.04 | -0.992 |
| 1,1-difluoro-1,2,2-trichloroethane | 0.21 | 2.312 | 0.0129 | 0.012 | 13.07 | -1.027 |
| 4-nitroacetanilide | 0.66 | 2.224 | 0.0147 | 0.016 | 22.46 | -0.974 |
| Aceticacid | 0.61 | 1.988 | 0.0227 | 0.023 | 19.73 | -0.949 |
| Benzoicacid | 0.59 | 1.976 | 0.0233 | a | 20.13 | -0.950 |
| Propyne | 0.12 | 2.429 | 0.0095 | 0.007 | 6.36 | -1.049 |
| Pyrrole | 0.41 | 2.191 | 0.0153 | 0.014 | 16.27 | -1.000 |
| Trichloroethylene | 0.08 | 2.429 | 0.0099 | 0.008 | 8.89 | -1.046 |
| 2-nitrophenol | 0.05 | 2.415 | 0.0091 | 0.004 | 4.75 | -0.954 |
| Indazole | 0.53 | 2.140 | 0.0170 | a | 17.66 | -0.989 |

a Calculation of property failed
